# Supplementary material for: Temporal and palaeoclimatic context of the evolution of insular woodiness in the Canary Islands
Source: PubMed Central journal article supplement (PMC8427628; doi:10.1002/ece3.7986), 2021-08-17

S1

*Argyranthemum*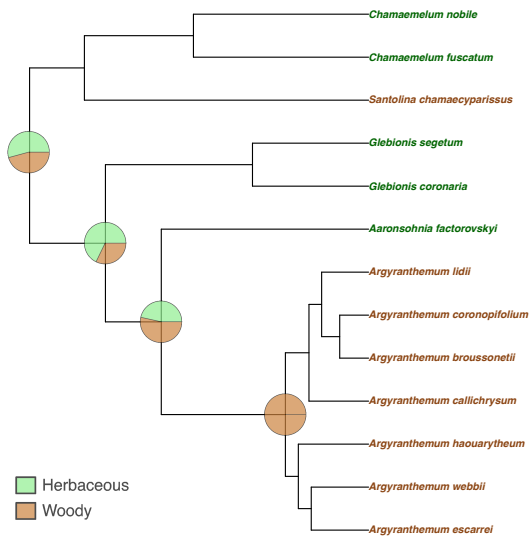

S2

*Carlina - Atractylis*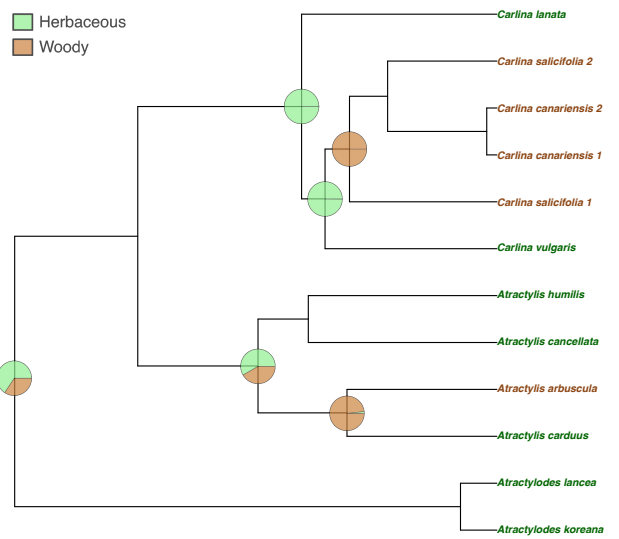

S3

*Convolvulus*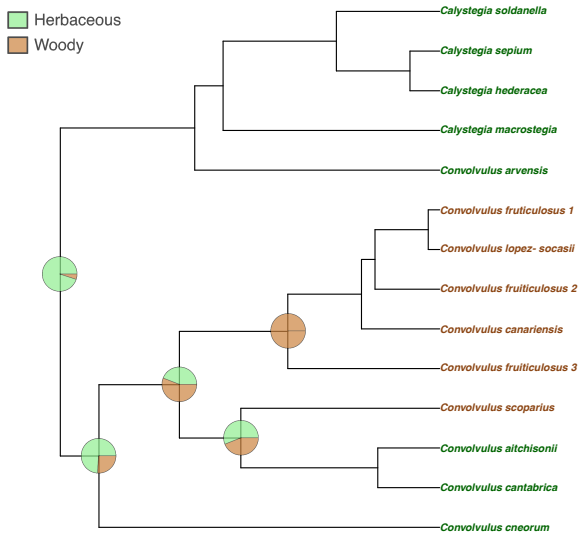

S4

*Crambe*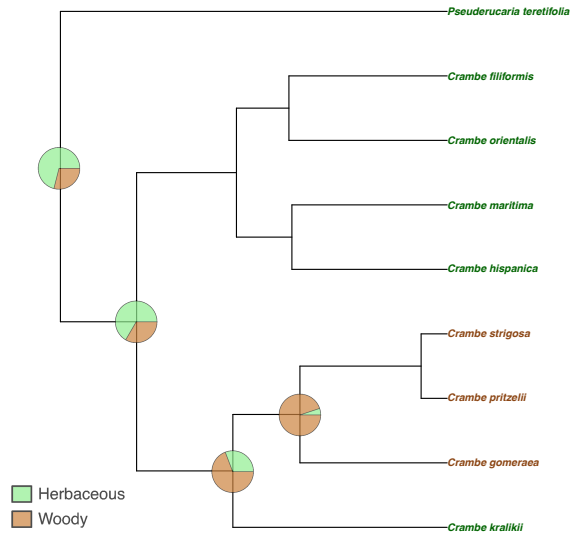

S5

*Descurainia*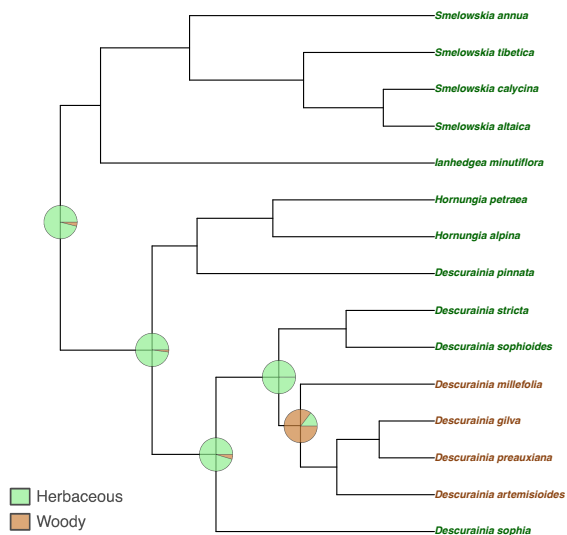

S6

*Digitalis - Plantago*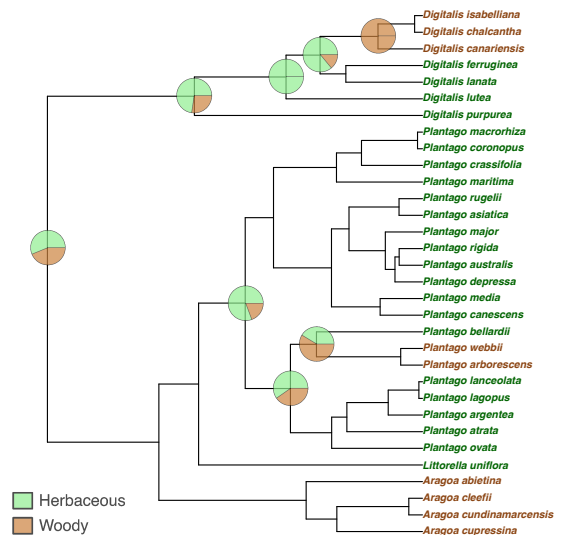

S7

### Echium

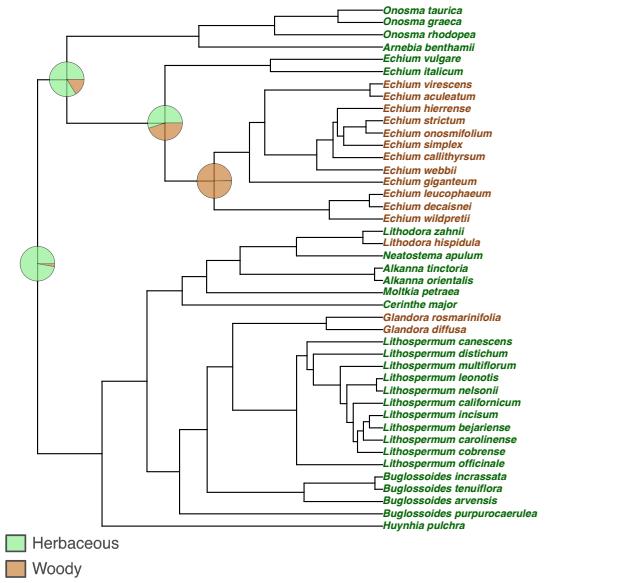

S8

### Lobularia

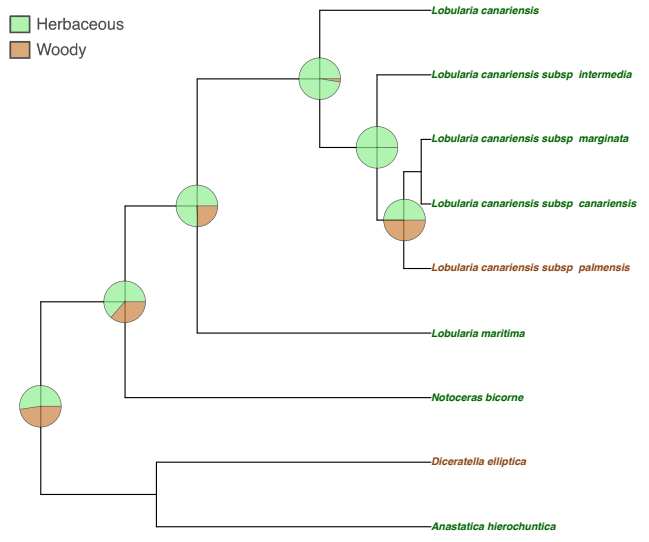

S9

### Micromeria

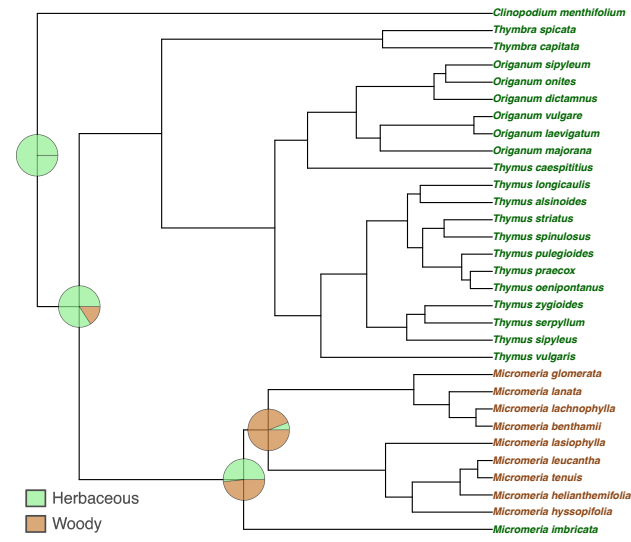

S10

### Sideritis

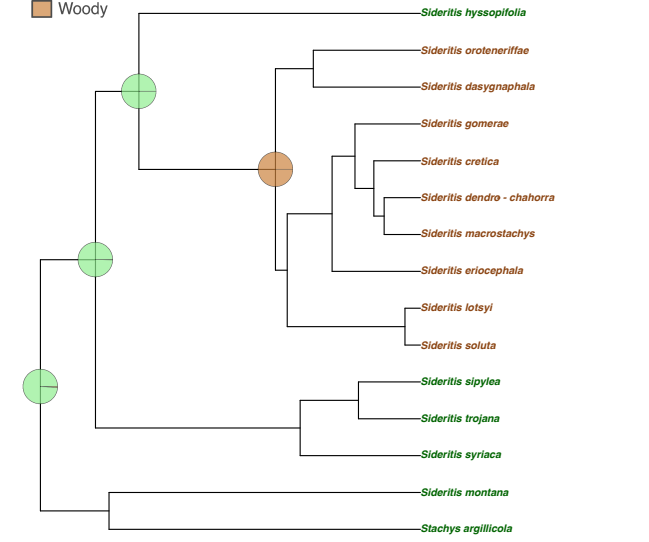

S11

### Silene

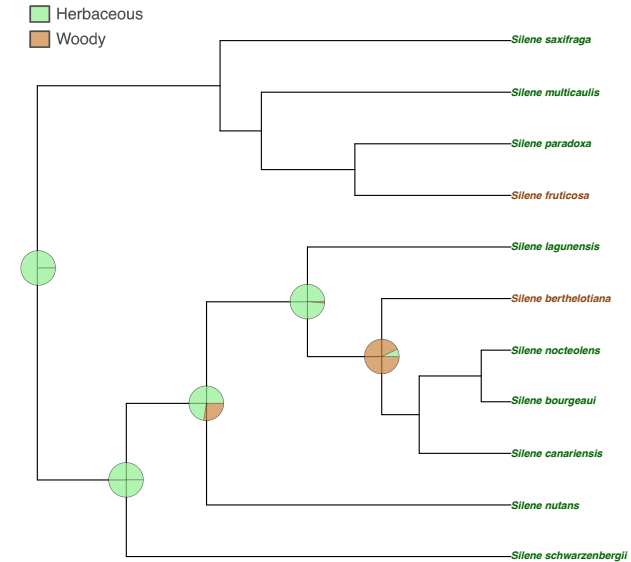

S12

### Sonchus

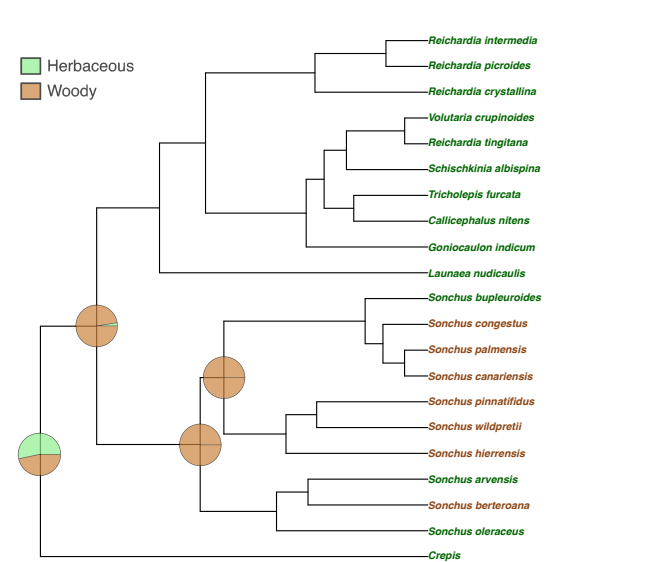

Supplement: ECE3-11-12220-s001.pdf [file ECE3-11-12220-s001.pdf]
