# Supplementary material for: Temporal and palaeoclimatic context of the evolution of insular woodiness in the Canary Islands
Source: PubMed Central journal article supplement (PMC8427628; doi:10.1002/ece3.7986), 2021-08-17

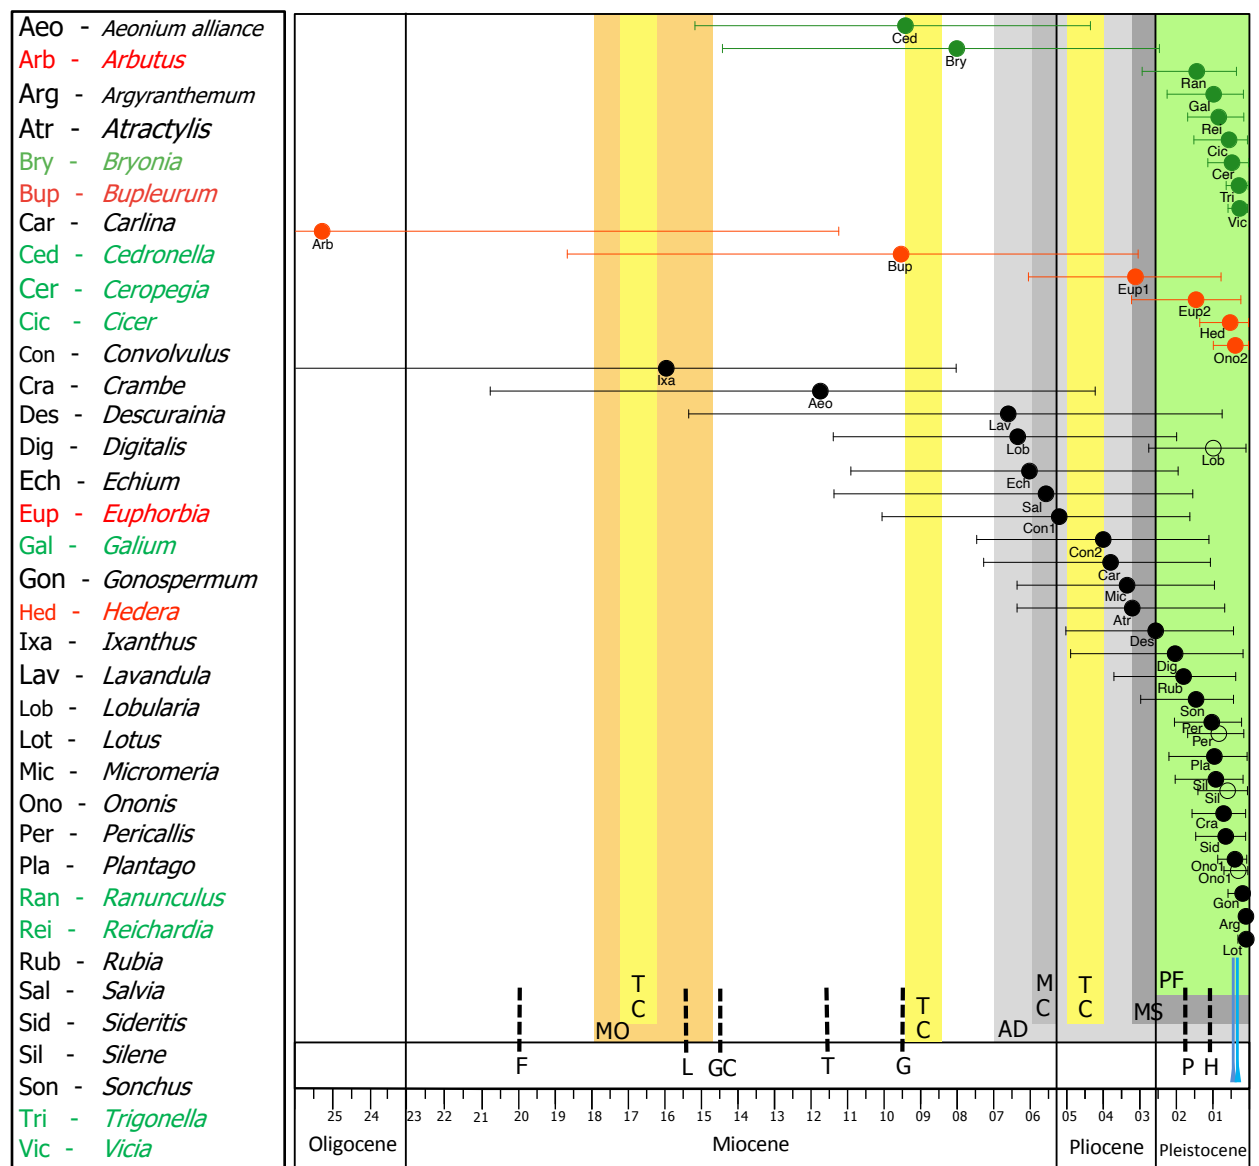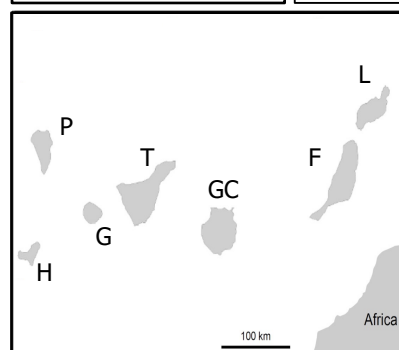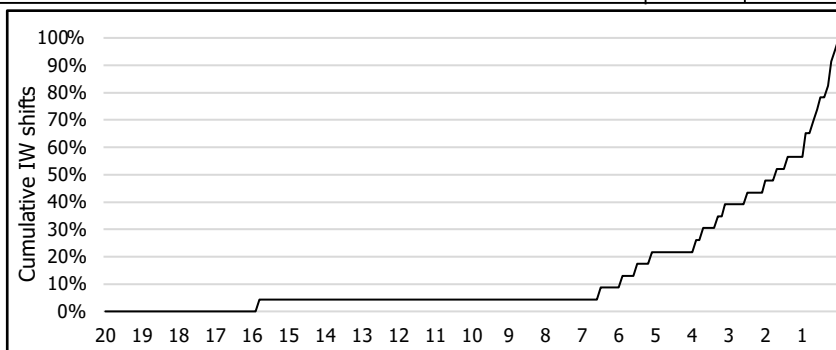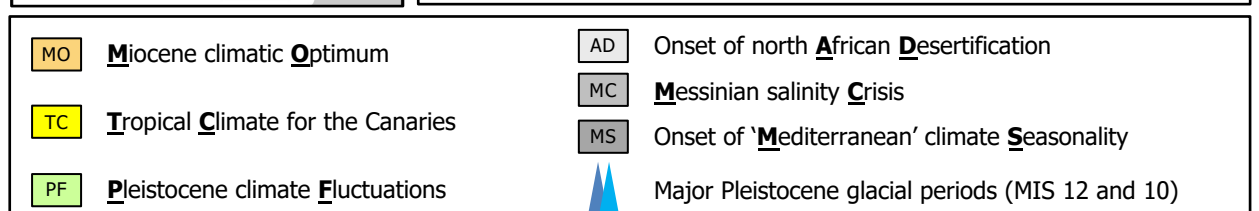

Supplement: ECE3-11-12220-s004.pdf [file ECE3-11-12220-s004.pdf]
